# Supplementary material for: Smoking and COPD Knowledge in the General Spanish Population: A CONOCEPOC Study
Source: MDPI journal article supplement (doi:10.3390/jcm12134473), 2023-07-04
Supplement: s1 [file s1]

Supplementary Table 1: Characteristics of subjects surveyed.

|                                             | 2011 survey<br>n=6528 | 2021 survey<br>n=6534 |
|---------------------------------------------|-----------------------|-----------------------|
| Sex, male, n (%)                            | 3060 (46.9)           | 1059 (53.6)           |
| Age (avg $\pm$ SD)                          | 59.8 (13.1)           | 61.5 (13.1)           |
| Smoking history, n (%)                      |                       |                       |
| Never smoked                                | 3441 (52.7)           | 3554 (54.4)           |
| Former smoker                               | 1819 (27.9)           | 2018 (30.9)           |
| Current smoker                              | 1268 (19.4)           | 958 (14.7)            |
| Attempted to quit smoking, n (%)            | 798 (62.9)            | 609 (63.6)            |
| Perceived level of health, (avg $\pm$ SD) ¶ | 7.1 (1.7)             | 7.4 (1.7)             |
| Report respiratory symptoms, n (%)          | 1877 (28.8)           | 1618 (24.8)           |

Data expressed as mean (standard deviation) or in absolute (relative) frequencies according to the nature of the variable.

¶ Perceived health was evaluated on a scale from 0 to 10 points, with a higher score meaning better perceived health.
