# Supplementary material for: Smoking and COPD Knowledge in the General Spanish Population: A CONOCEPOC Study
Source: MDPI journal article supplement (doi:10.3390/jcm12134473), 2023-07-04
Supplement: s1 [file s1]

Supplementary Figure 1: Prevalence of spontaneous knowledge of COPD (%) by autonomous community in 2011 and 2021.

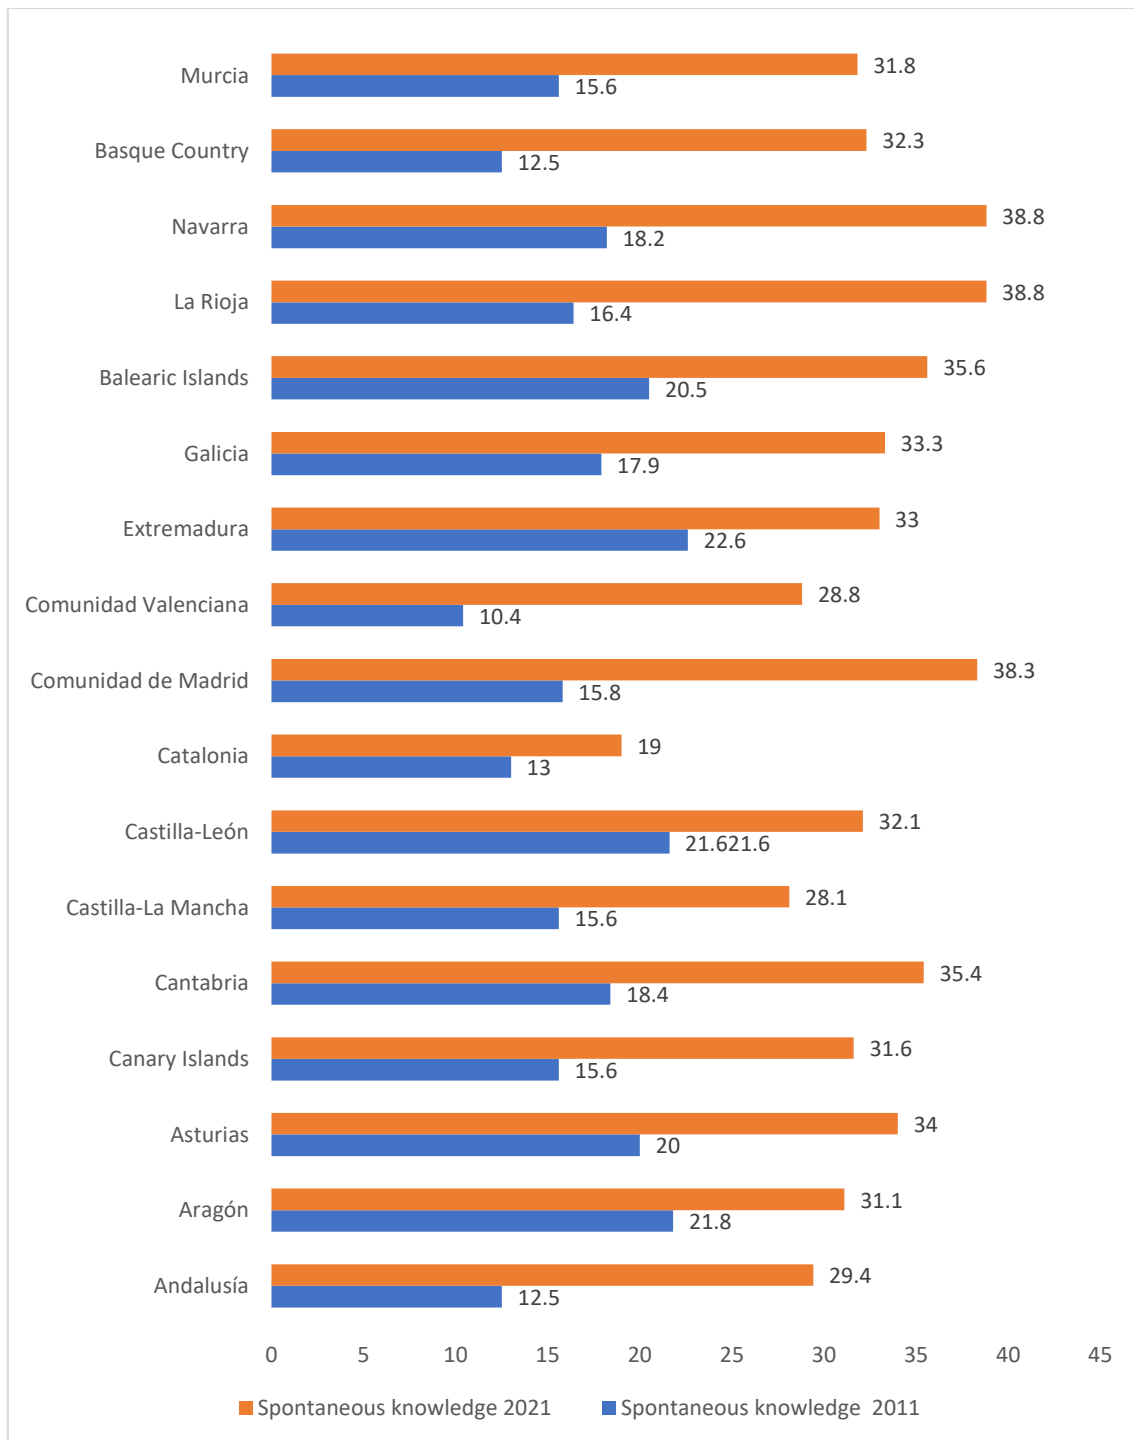

Data expressed in frequencies (%)
